# Supplementary material for: Total synthesis of the proposed structure of cyclic hexadepsipeptide veraguamide A
Source: Royal Society of Chemistry journal article supplement (doi:10.1039/c2ob26002f), 2012-01-01

## SUPPORTING INFORMATION II

For

Total synthesis of the proposed structure of cyclic hexadepsipeptide Veraguamide A

Dongyu Wang,<sup>a,b</sup> Xian Jia,<sup>\*,a</sup> Ao Zhang<sup>\*,b</sup>

<sup>a</sup>School of Pharmaceutical Engineering, Shenyang Pharmaceutical University, Shenyang, China  
110016. jiaxian206@163.com; Fax: 86-24-23986436; Tel: 86-24-23986456.

<sup>b</sup>Synthetic Organic & Medicinal Chemistry Laboratory (SOMCL), Shanghai Institute of Materia  
Medica (SIMM), Chinese Academy of Sciences, Shanghai, China 201203.  
aozhang@mail.shnc.ac.cn; Fax: 86-21-50806035; Tel: 86-21-50806035.

### Table of contents

|                                                                                                                                                                                                                                                                                                                               |           |
|-------------------------------------------------------------------------------------------------------------------------------------------------------------------------------------------------------------------------------------------------------------------------------------------------------------------------------|-----------|
| 1. <sup>1</sup> H NMR and <sup>13</sup> C NMR spectra for <b>2</b> , <b>3</b> , <b>P1</b> , <b>4</b> , <b>4'</b> , <b>P2</b> , <b>P2'</b> <b>5</b> , <b>5-a</b> ,<br><b>6</b> , <b>7</b> , <b>14</b> , <b>P3</b> , <b>10</b> , <b>P3-a</b> , <b>11</b> , <b>15</b> , <b>16</b> , <b>18</b> , <b>19</b> , <b>20</b> , <b>1</b> | <b>2</b>  |
| 2. HSQC spectrum of veraguamide A ( <b>1</b> ) in CDCl <sub>3</sub> (500 MHz)                                                                                                                                                                                                                                                 | <b>19</b> |
| 3. The CD spectra of <b>18</b> and <b>18'</b>                                                                                                                                                                                                                                                                                 | <b>19</b> |
| 4. HPLC chromatogram for <b>P2</b> and <b>P2'</b>                                                                                                                                                                                                                                                                             | <b>20</b> |

300 MHz <sup>1</sup>H NMR of **2** in CD<sub>3</sub>OD

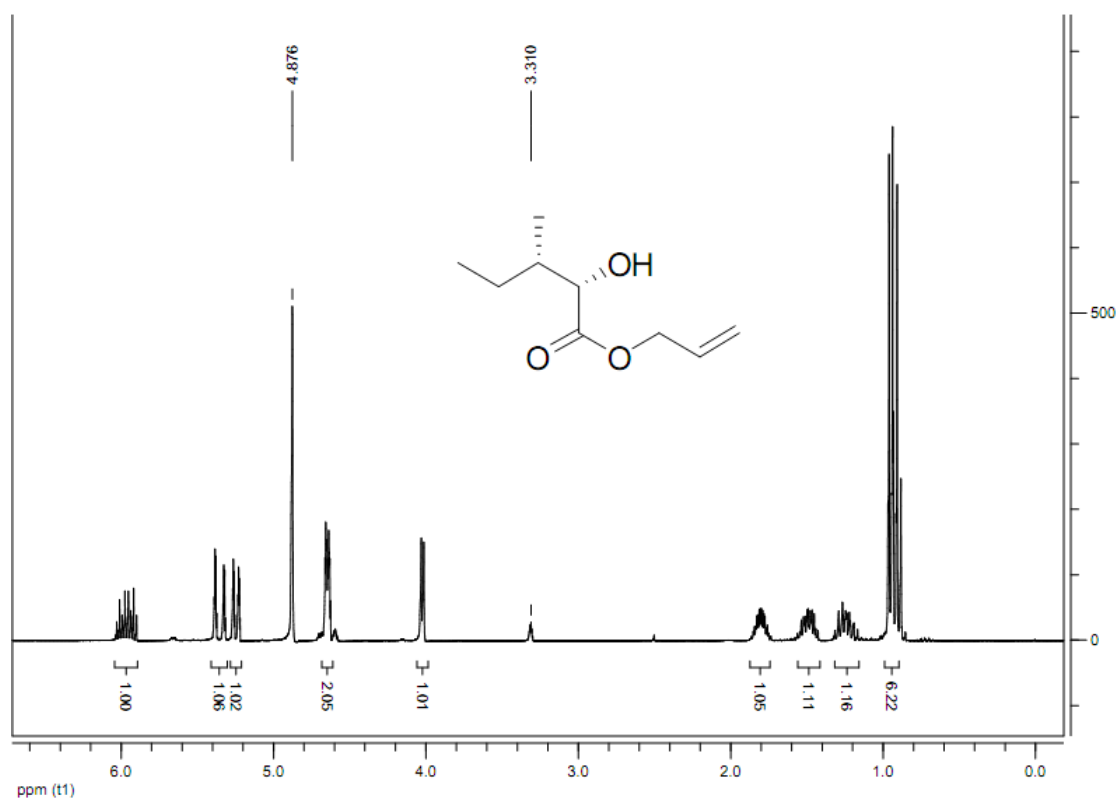

300 MHz  $^1\text{H}$  NMR of **3** in  $\text{CD}_3\text{OD}$

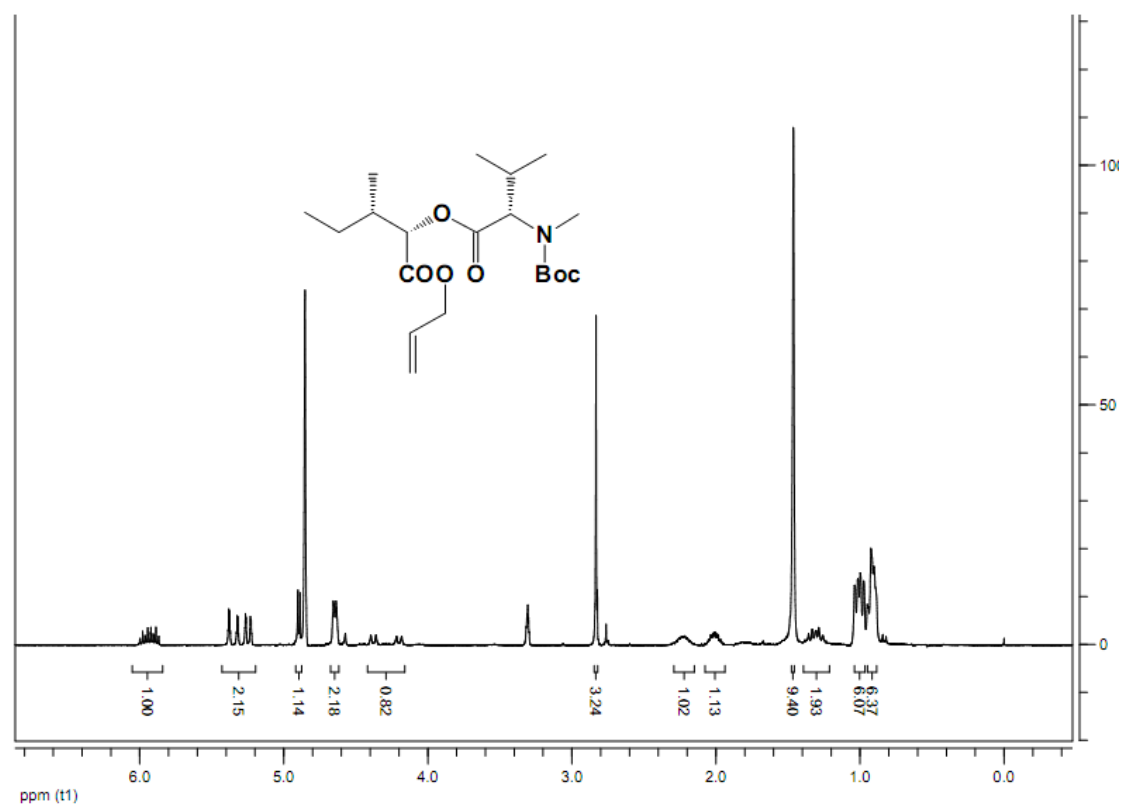

300 MHz  $^1\text{H}$  NMR of **P1** in  $\text{CD}_3\text{OD}$

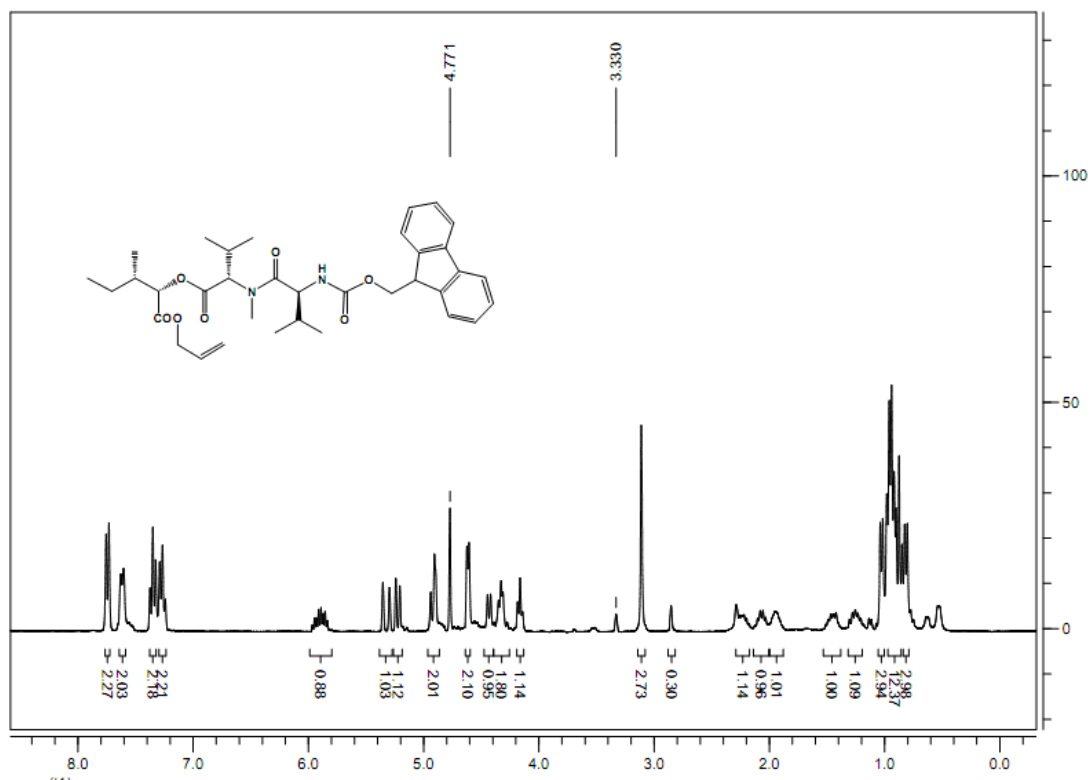

101 MHz  $^{13}\text{C}$  NMR of **P1** in  $\text{CD}_3\text{OD}$

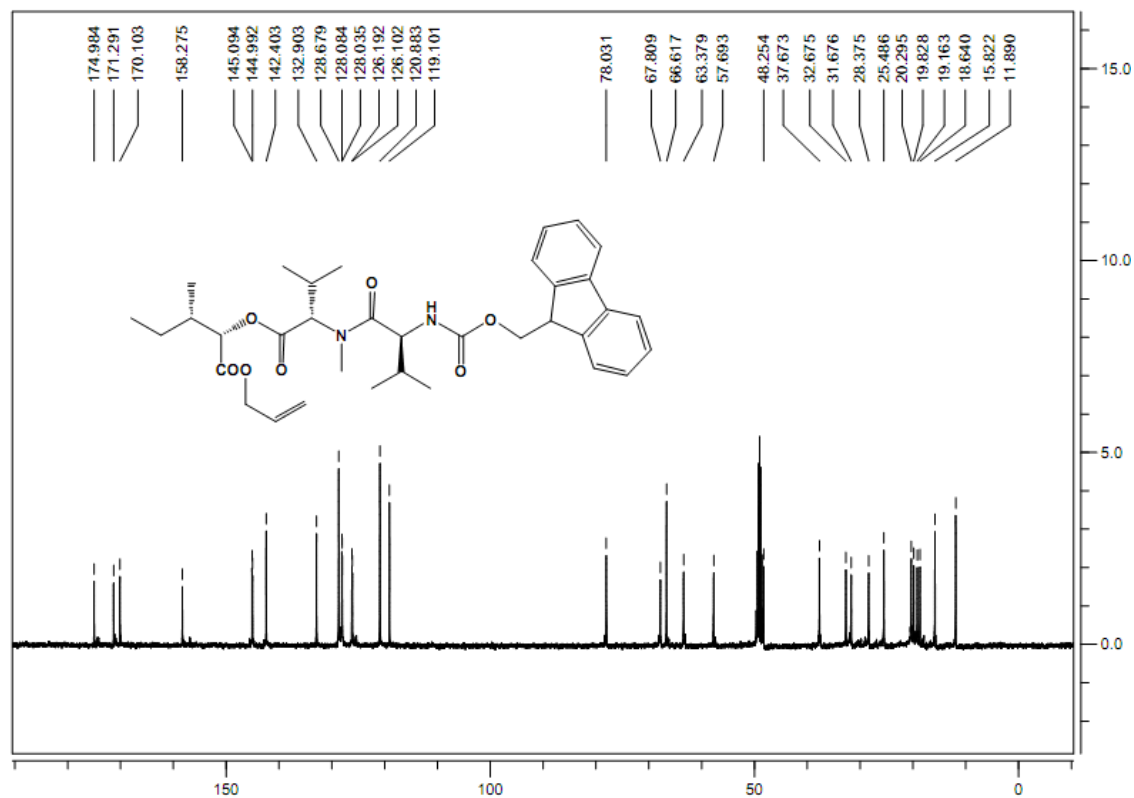

300 MHz  $^1\text{H}$  NMR of **4** in  $\text{CD}_3\text{OD}$

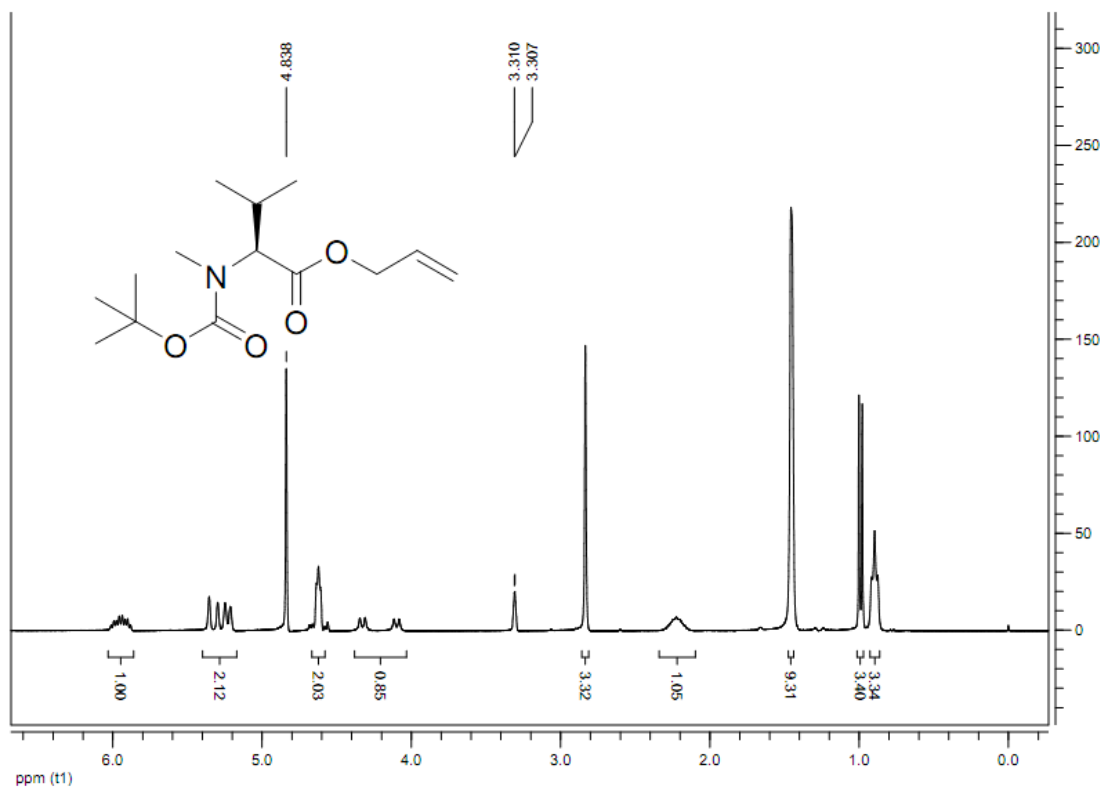

126 MHz  $^{13}\text{C}$  NMR of **4** in  $\text{CDCl}_3$

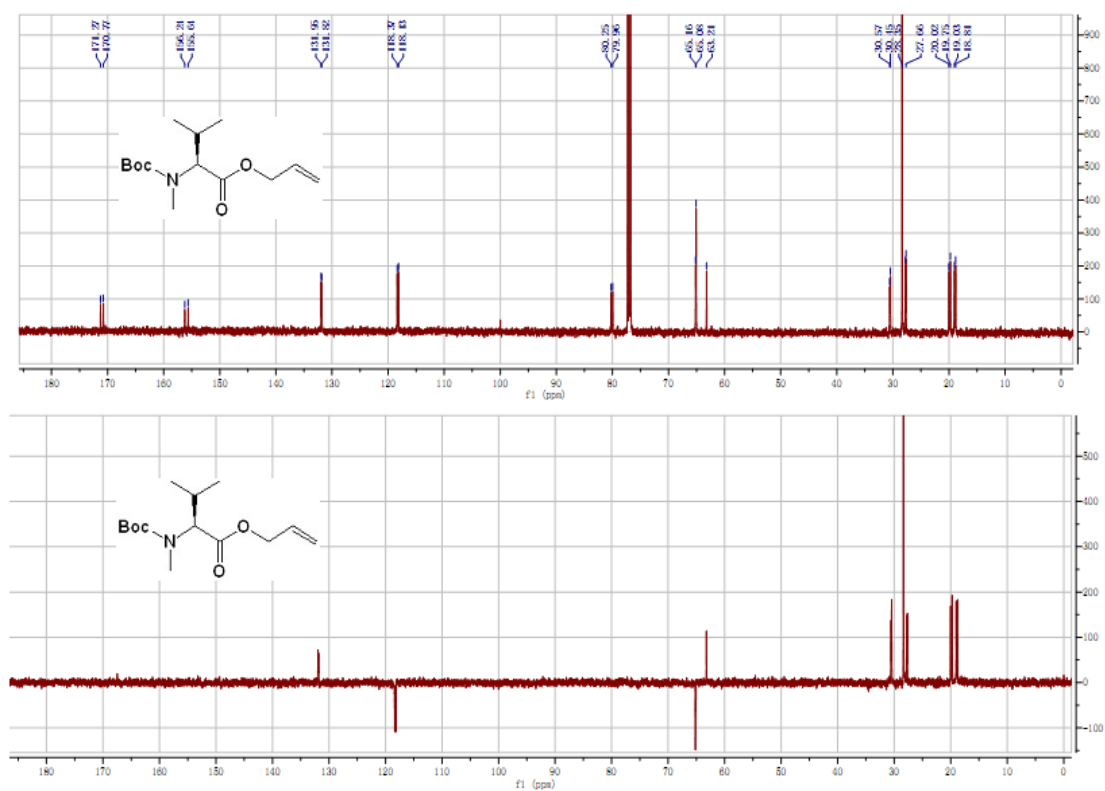

300 MHz  $^1\text{H}$  NMR of **4'** in  $\text{CDCl}_3$

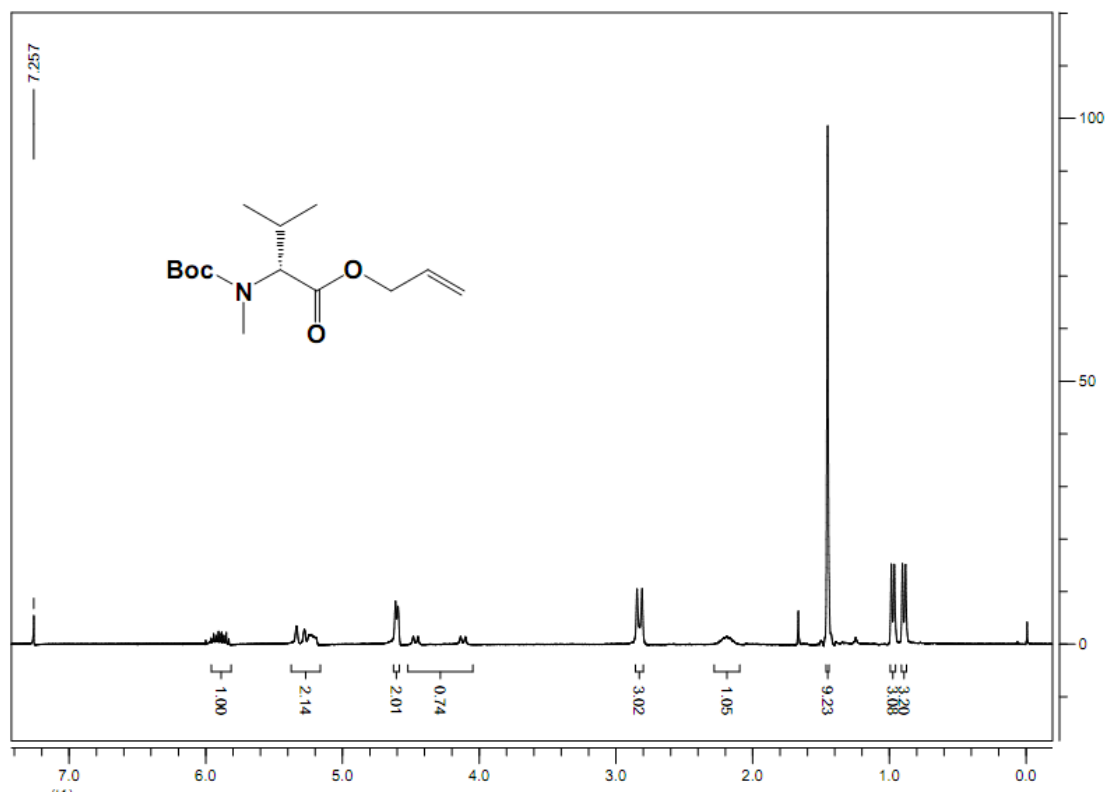

300 MHz <sup>1</sup>H NMR of **P2** in CDCl<sub>3</sub>

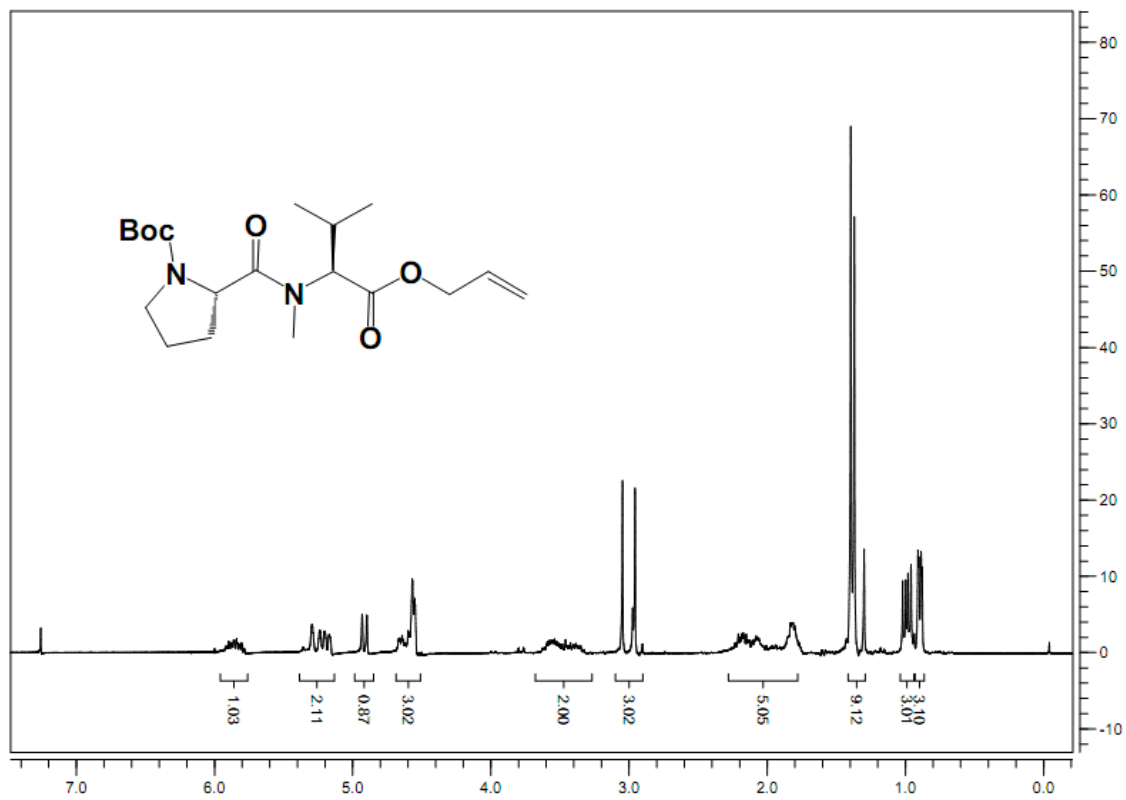

101 MHz <sup>13</sup>C NMR of **P2** in CD<sub>3</sub>OD

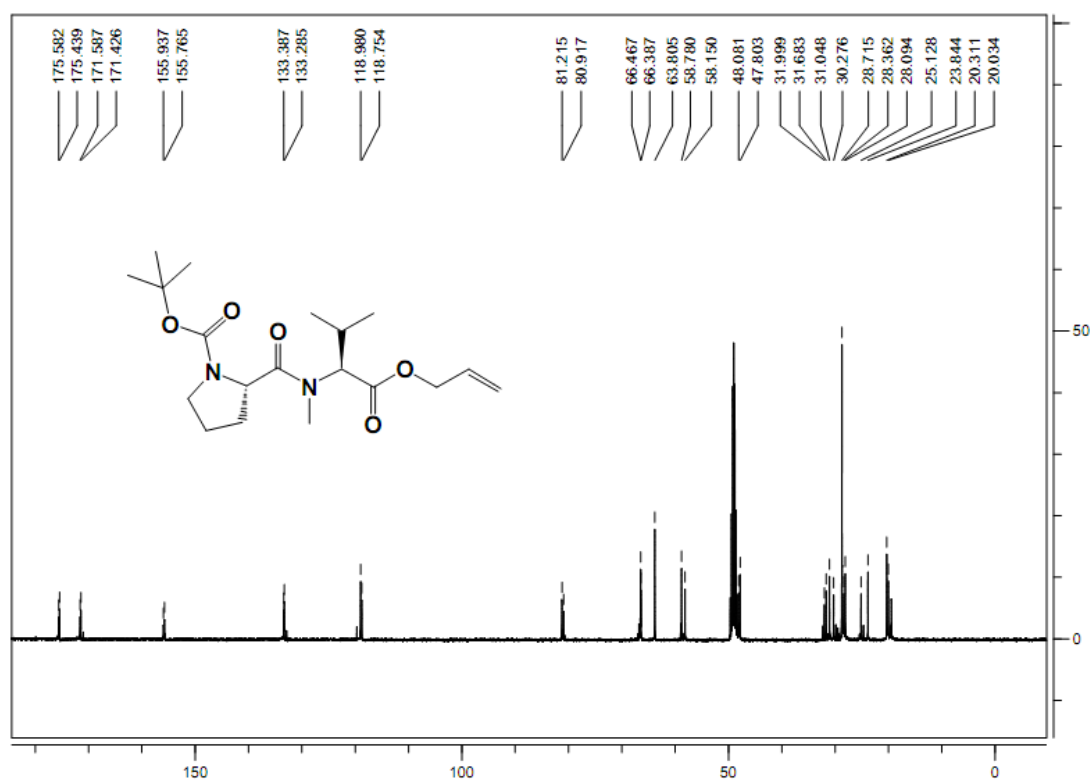

300 MHz <sup>1</sup>H NMR of **P2'** in CDCl<sub>3</sub>

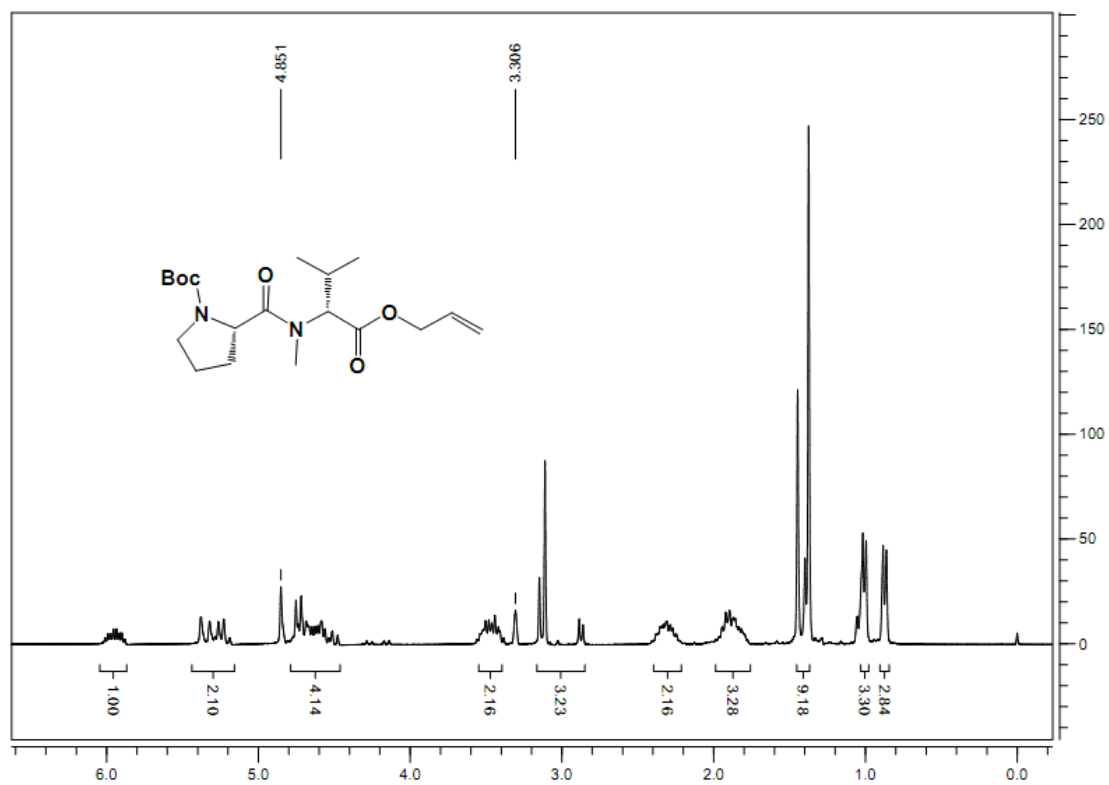

101 MHz  $^{13}\text{C}$  NMR of **P2'** in  $\text{CD}_3\text{OD}$

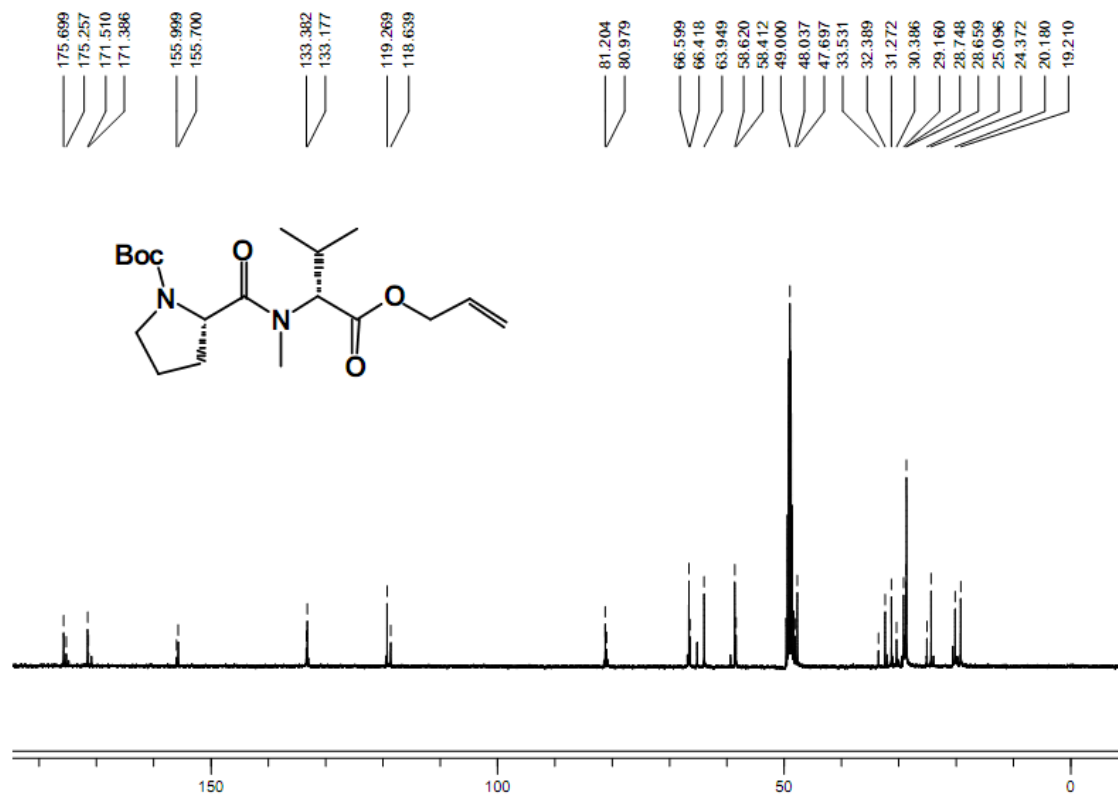

300 MHz  $^1\text{H}$  NMR of **5** in  $\text{CDCl}_3$

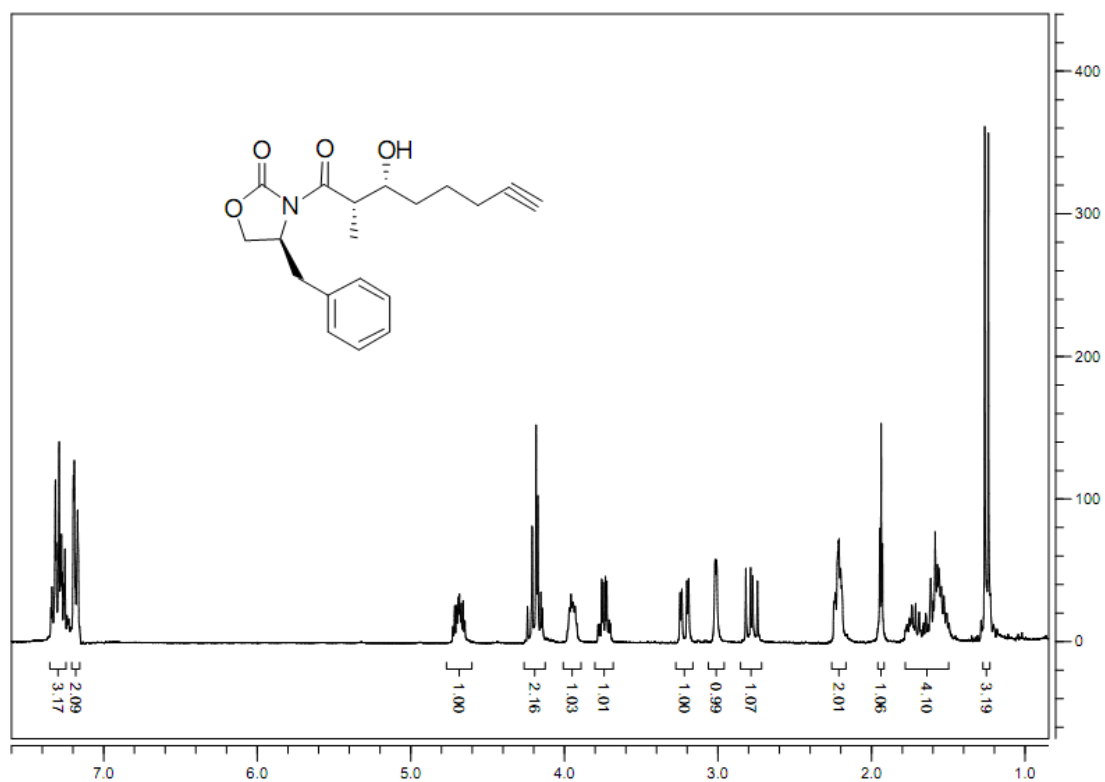

126 MHz  $^{13}\text{C}$  NMR of **5** in  $\text{CDCl}_3$

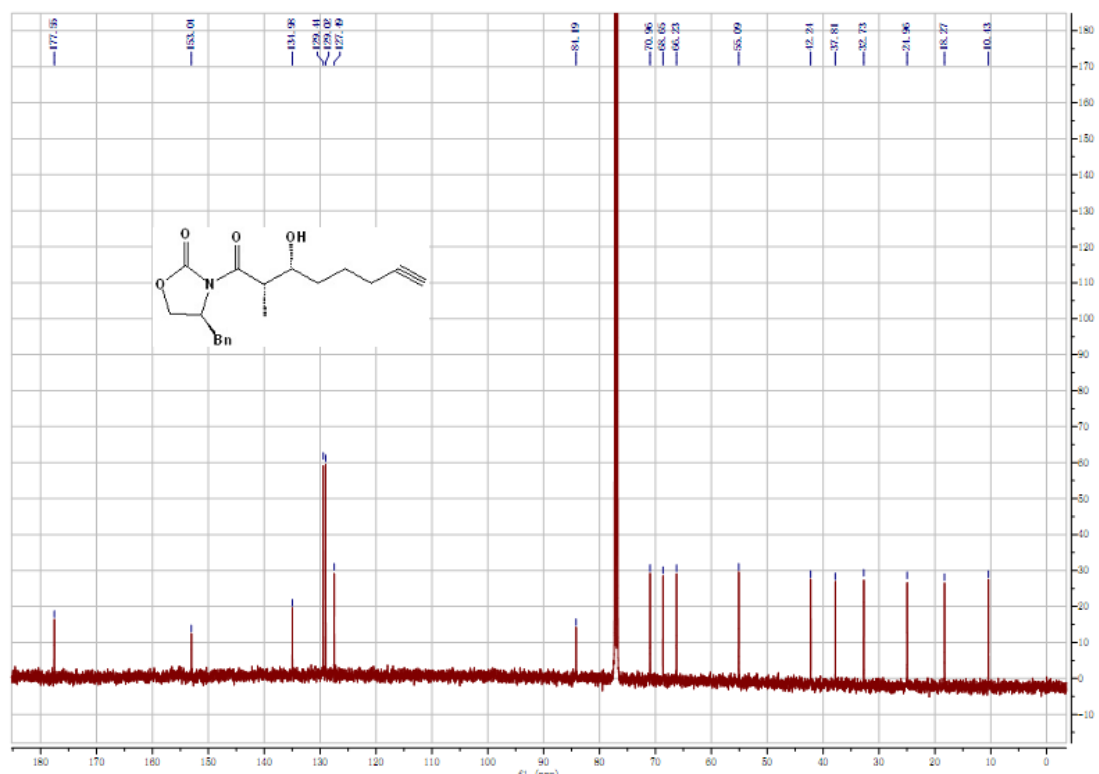

300 MHz  $^1\text{H}$  NMR of **5-a** in  $\text{CDCl}_3$



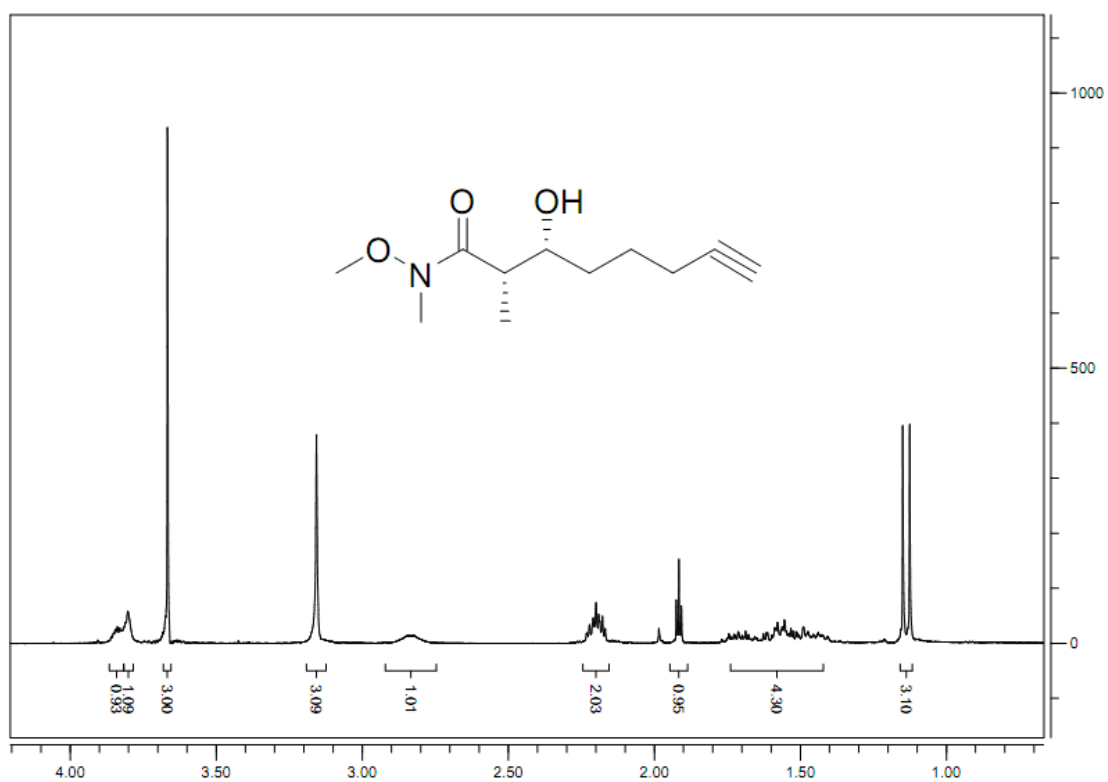

300 MHz  $^1\text{H}$  NMR of **6** in  $\text{CDCl}_3$

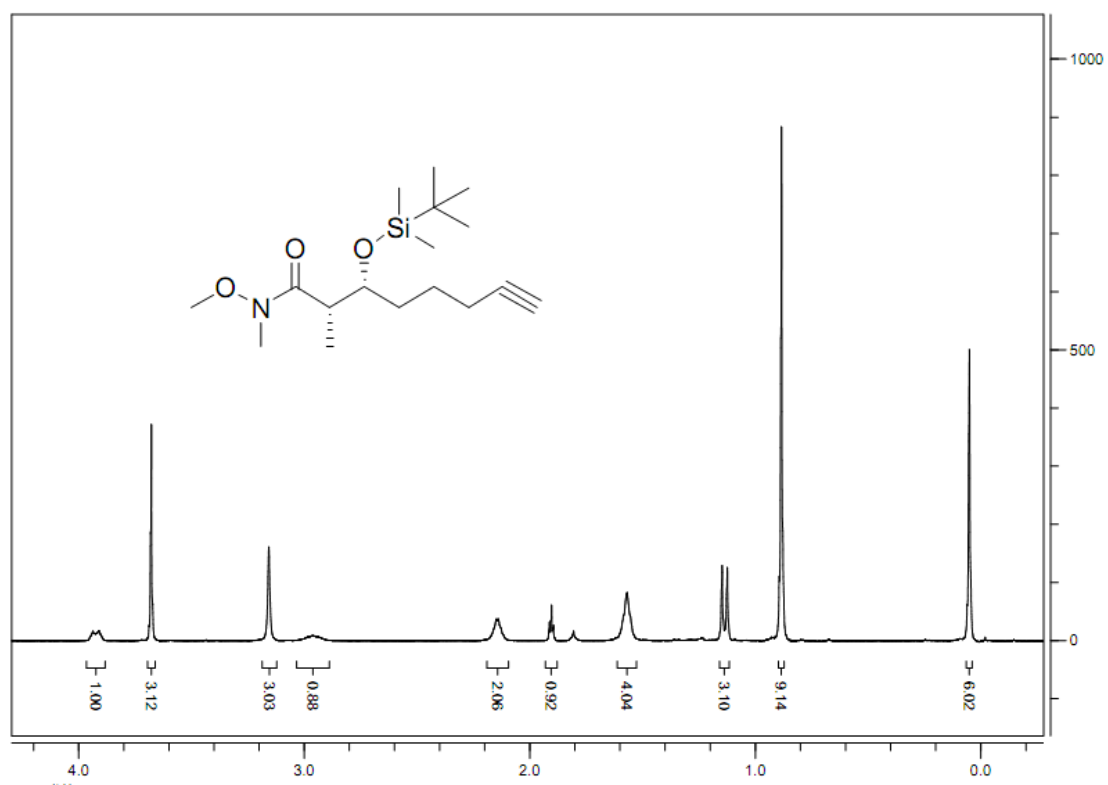

300 MHz  $^1\text{H}$  NMR of **7** in  $\text{CDCl}_3$

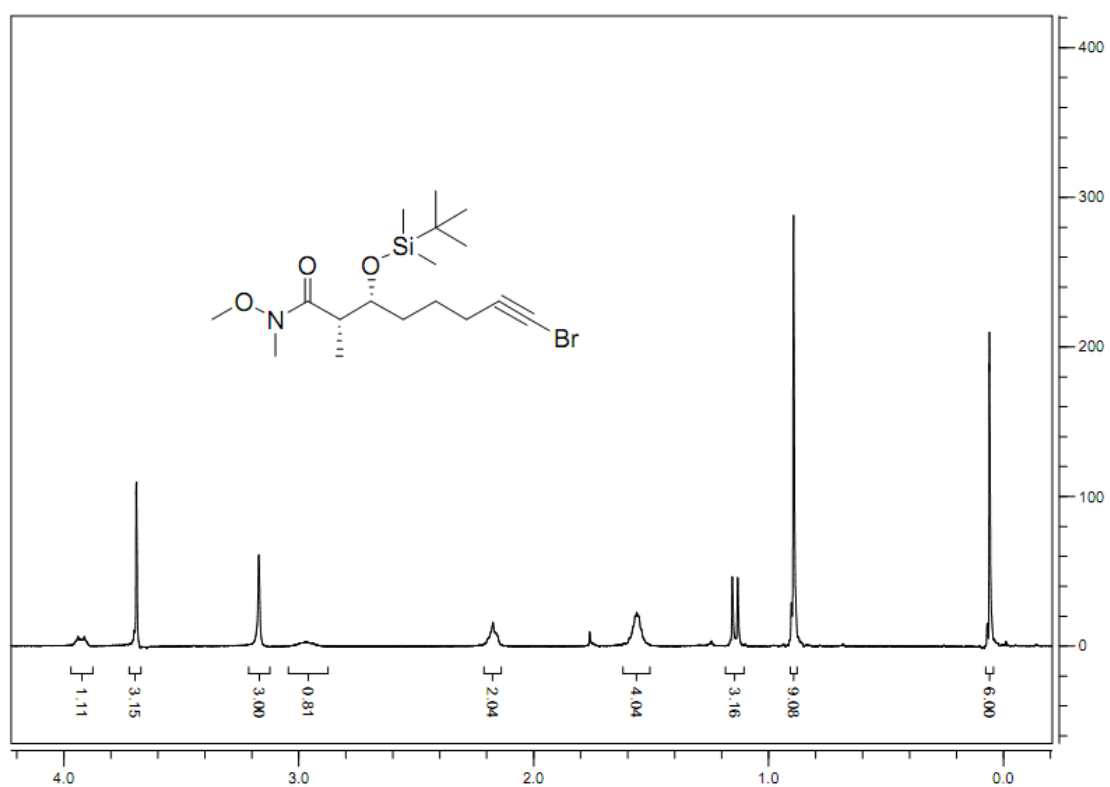

101 MHz  $^{13}\text{C}$  NMR of **7** in  $\text{CDCl}_3$

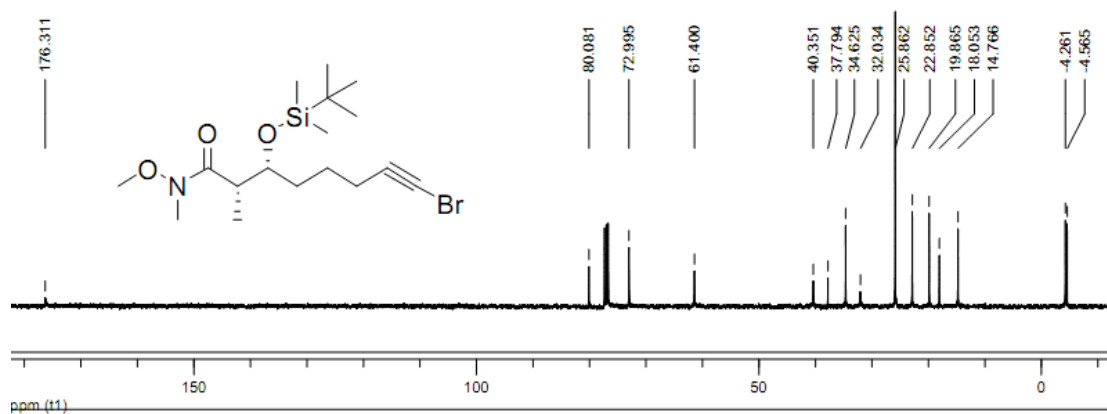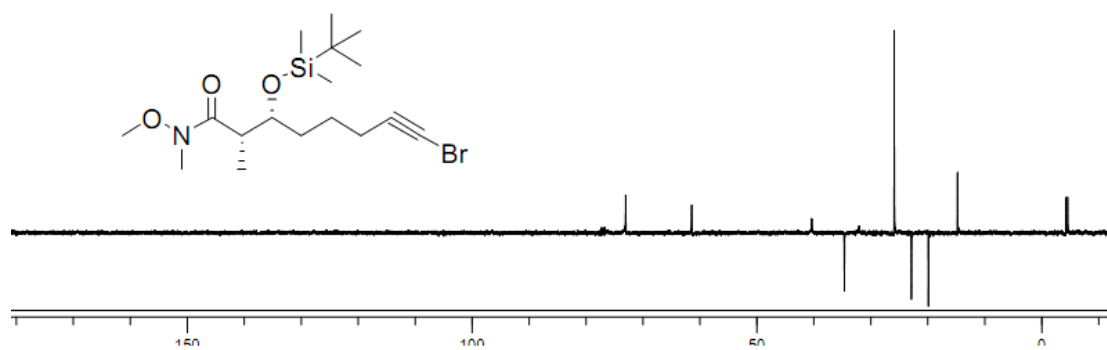

300 MHz  $^1\text{H}$  NMR of **14** in  $\text{CDCl}_3$

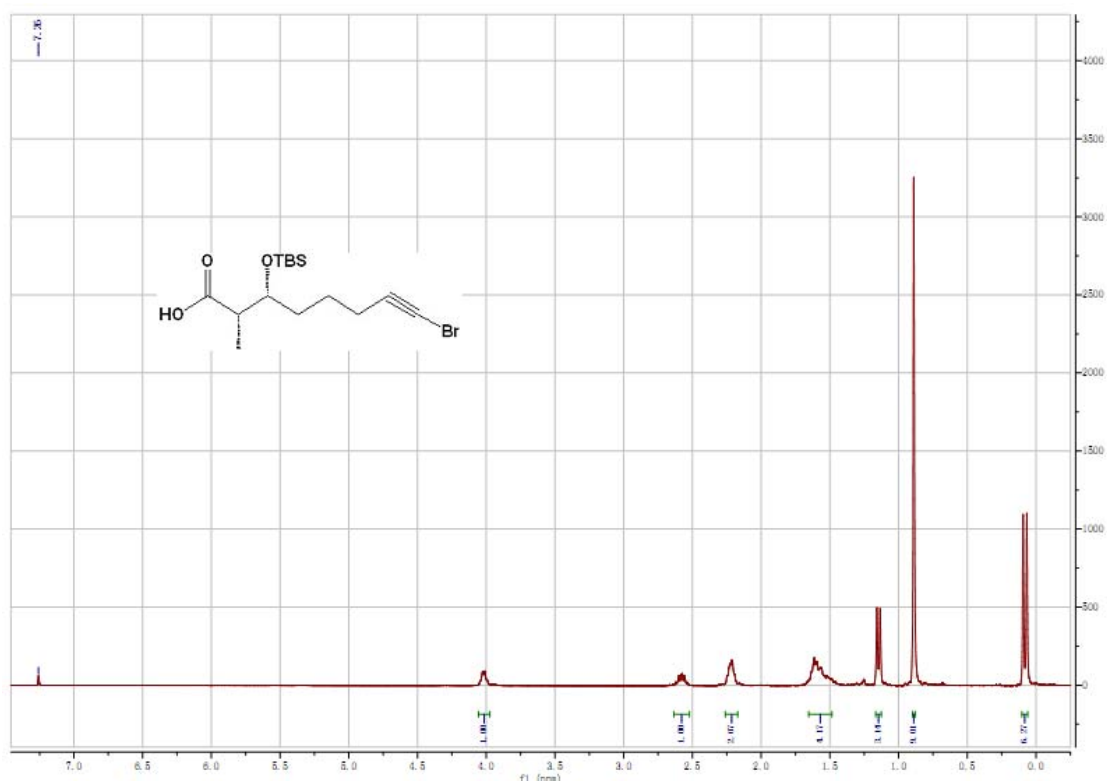

101 MHz  $^{13}\text{C}$  NMR of **14** in  $\text{CDCl}_3$

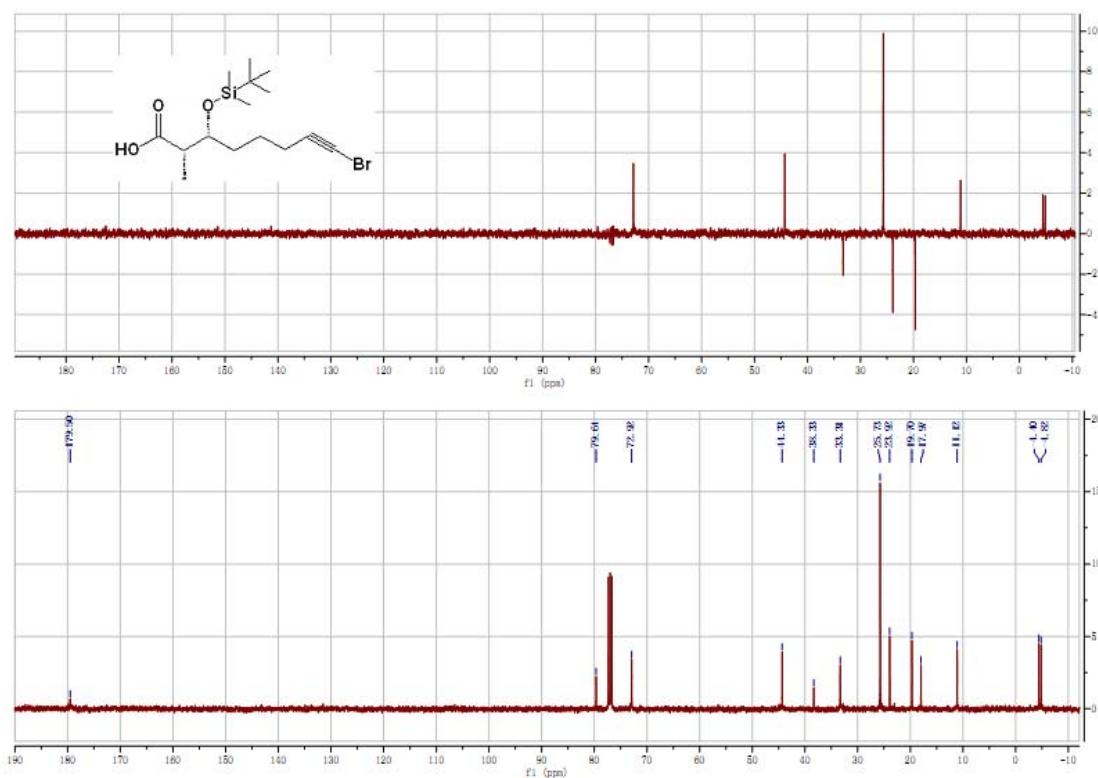

300 MHz  $^1\text{H}$  NMR of **P3** in  $\text{CDCl}_3$

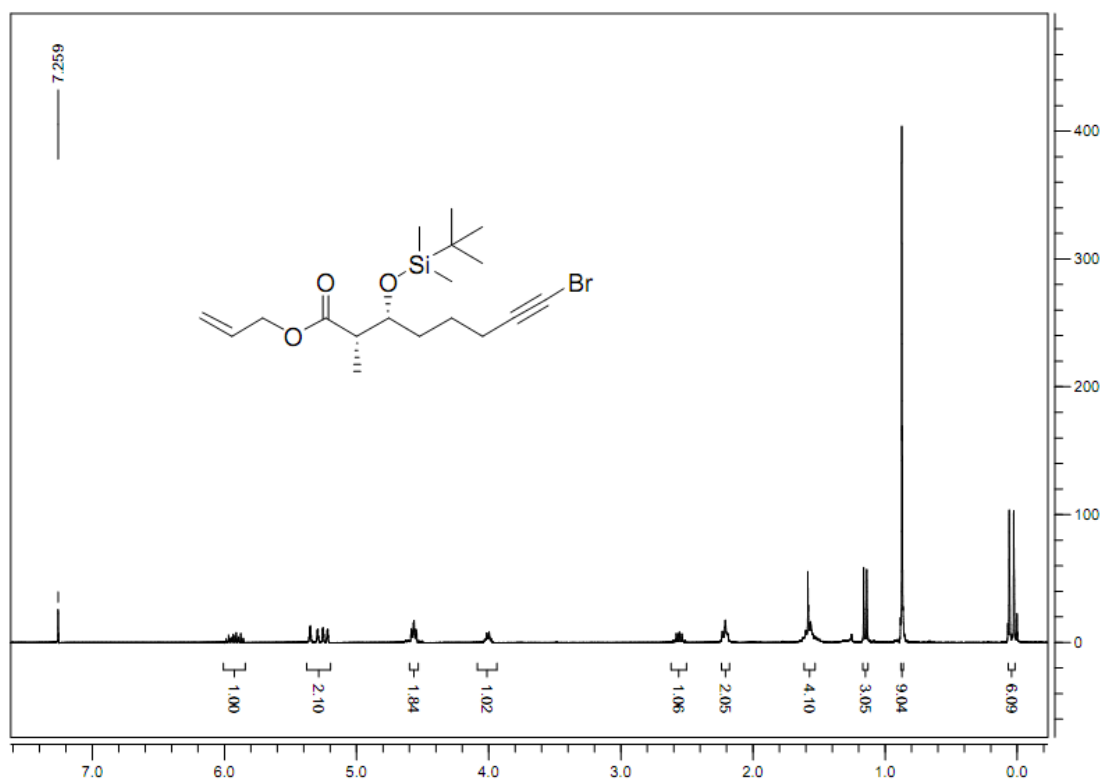

101 MHz  $^{13}\text{C}$  NMR of **P3** in  $\text{CDCl}_3$

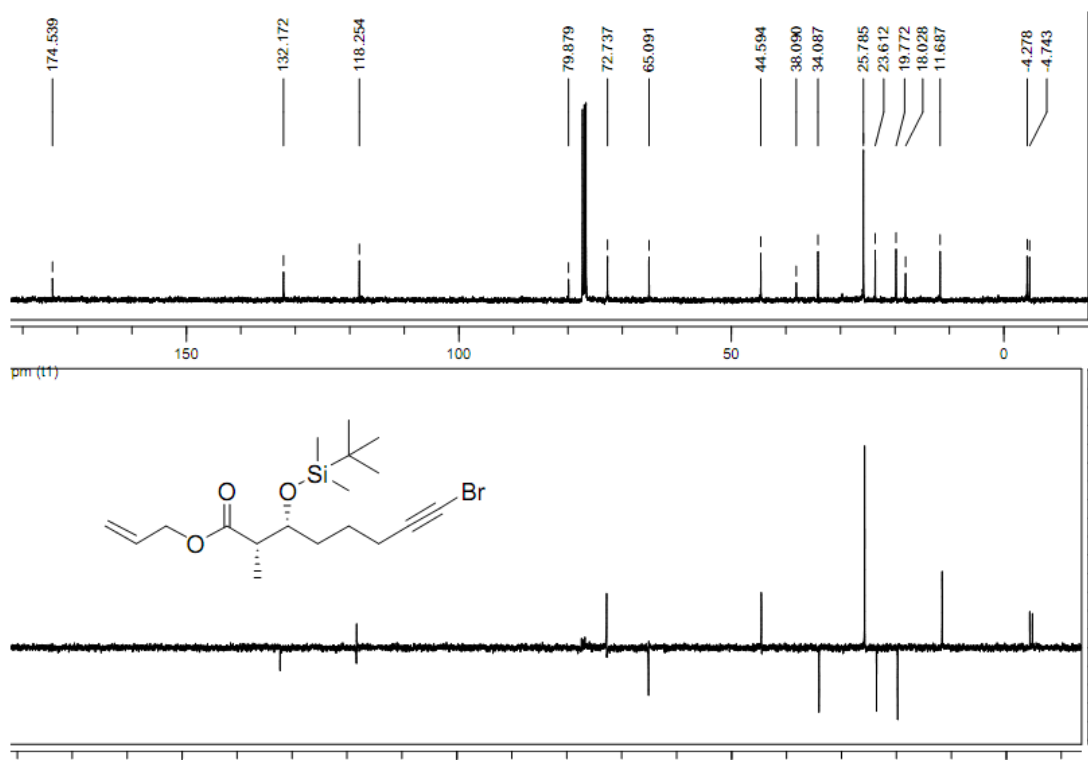

300 MHz  $^1\text{H}$  NMR of **10** in  $\text{CDCl}_3$

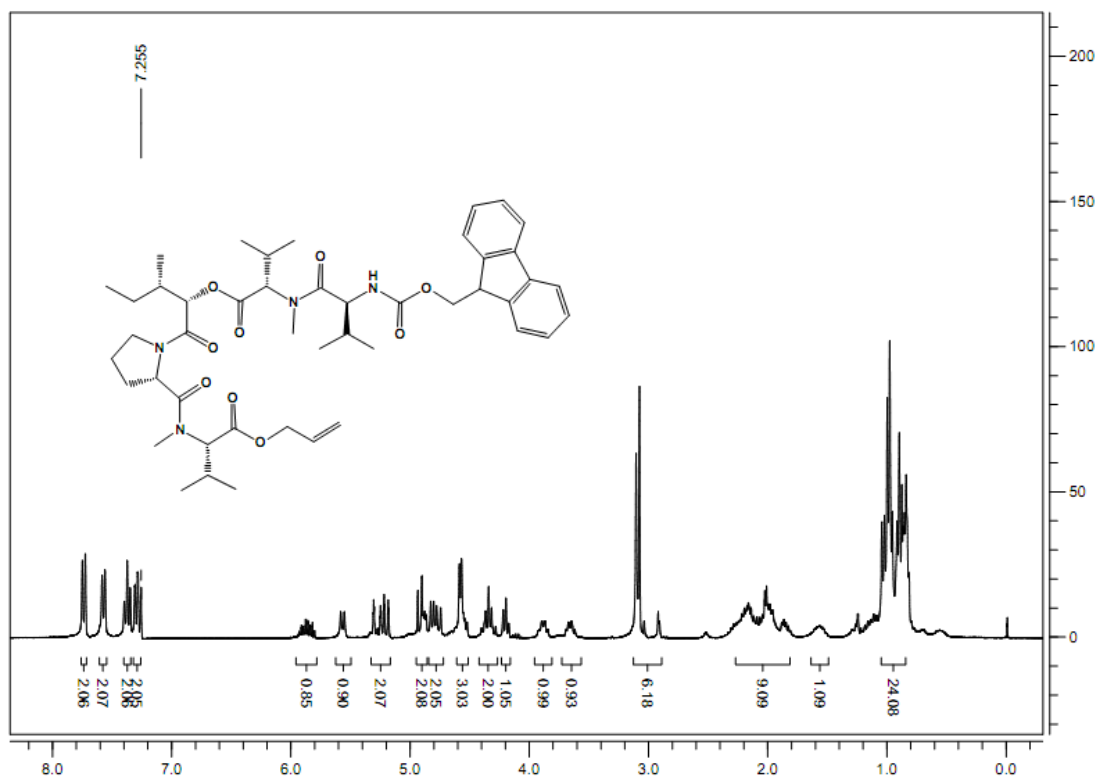

300 MHz  $^1\text{H}$  NMR of **P3-a** in  $\text{CDCl}_3$

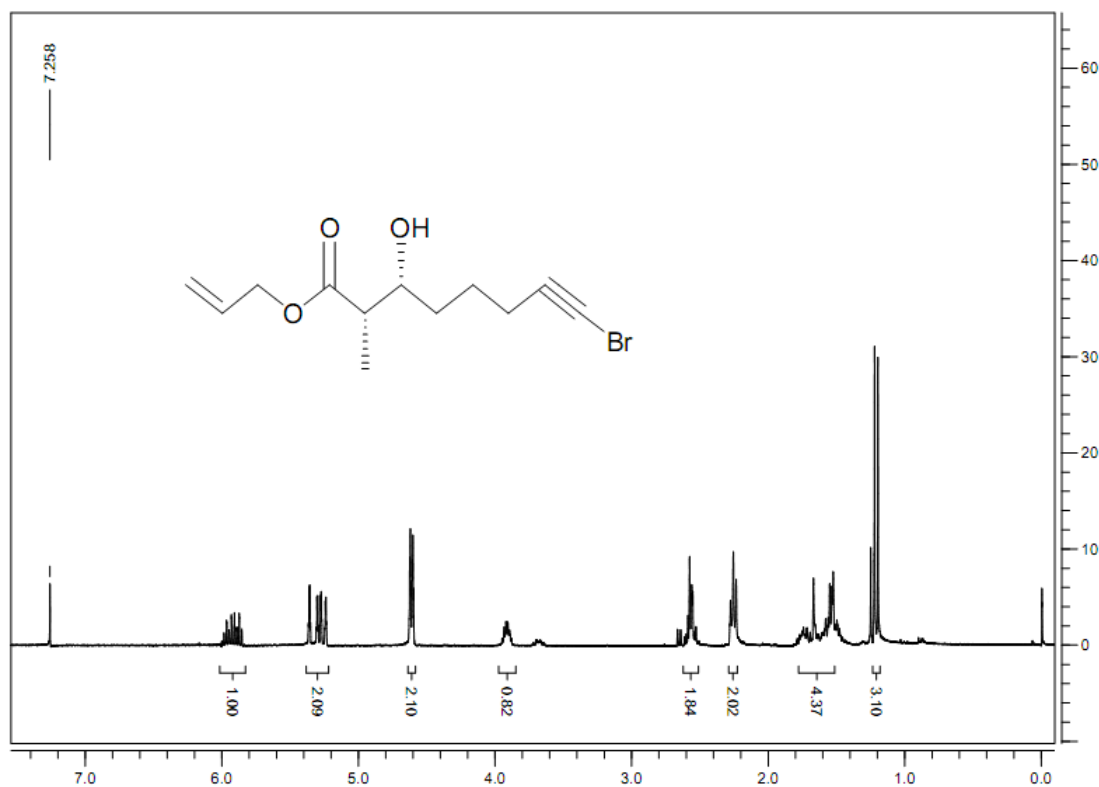

300 MHz  $^1\text{H}$  NMR of **11** in  $\text{CDCl}_3$

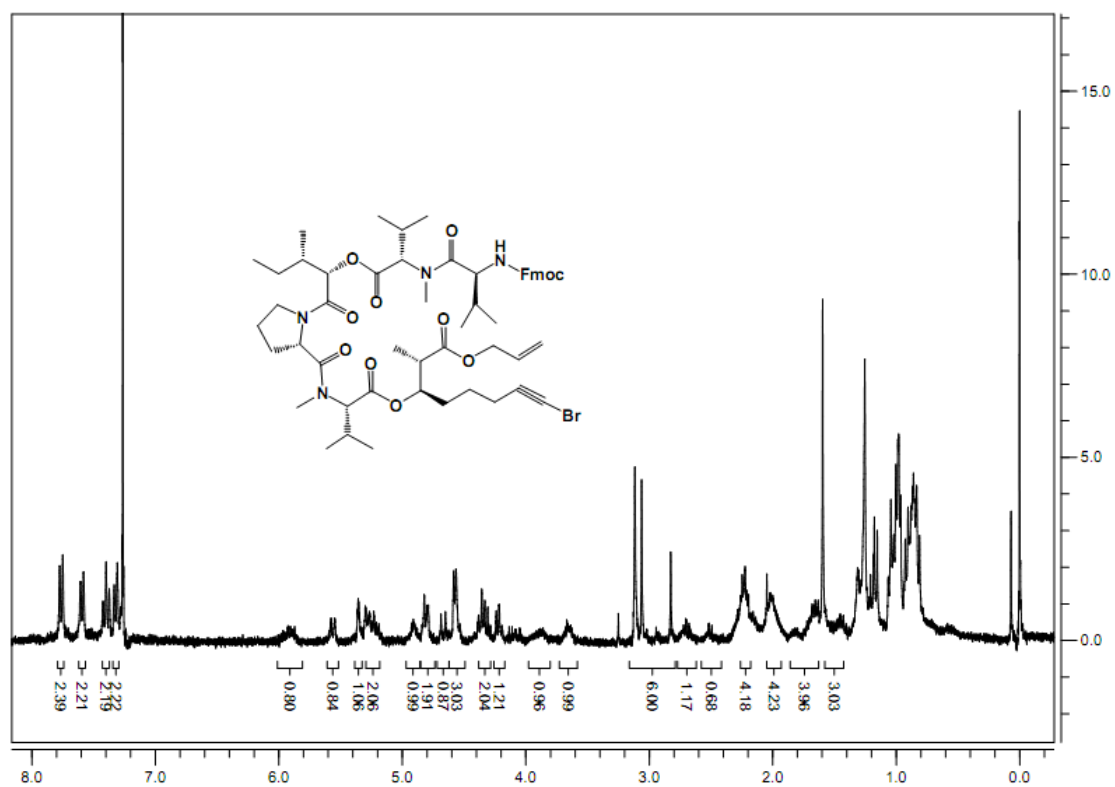

300 MHz  $^1\text{H}$  NMR of **15** in  $\text{CDCl}_3$

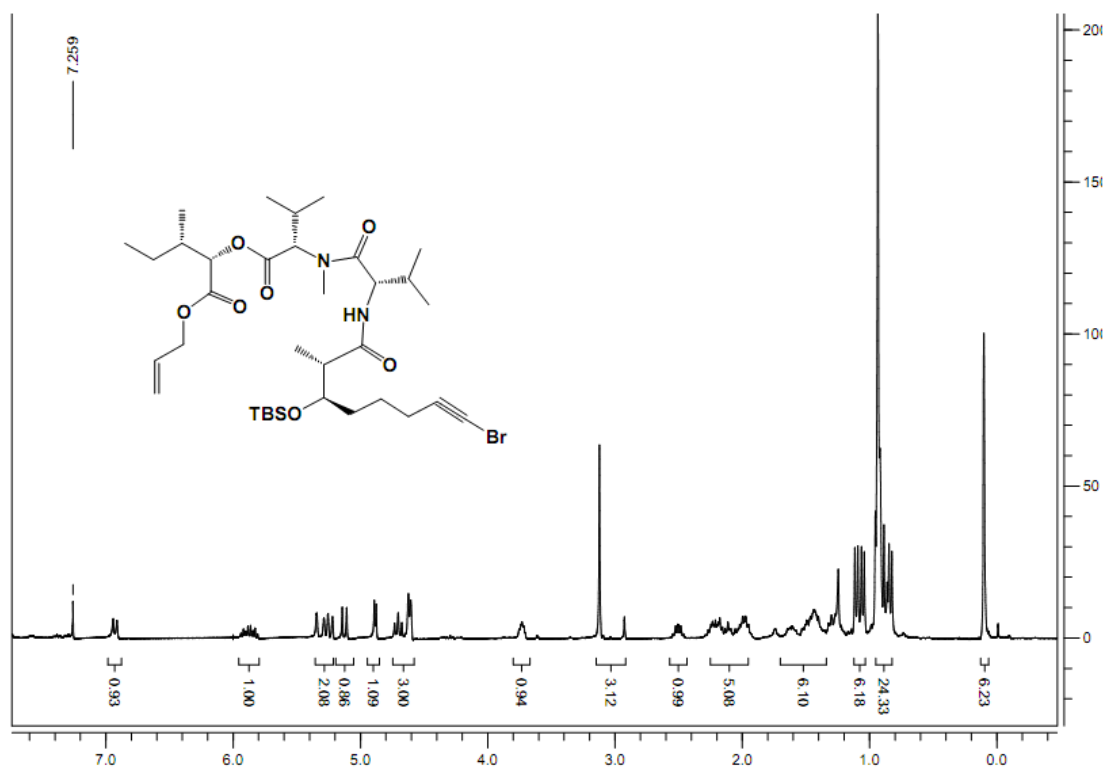

101 MHz  $^{13}\text{C}$  NMR of **15** in  $\text{CDCl}_3$

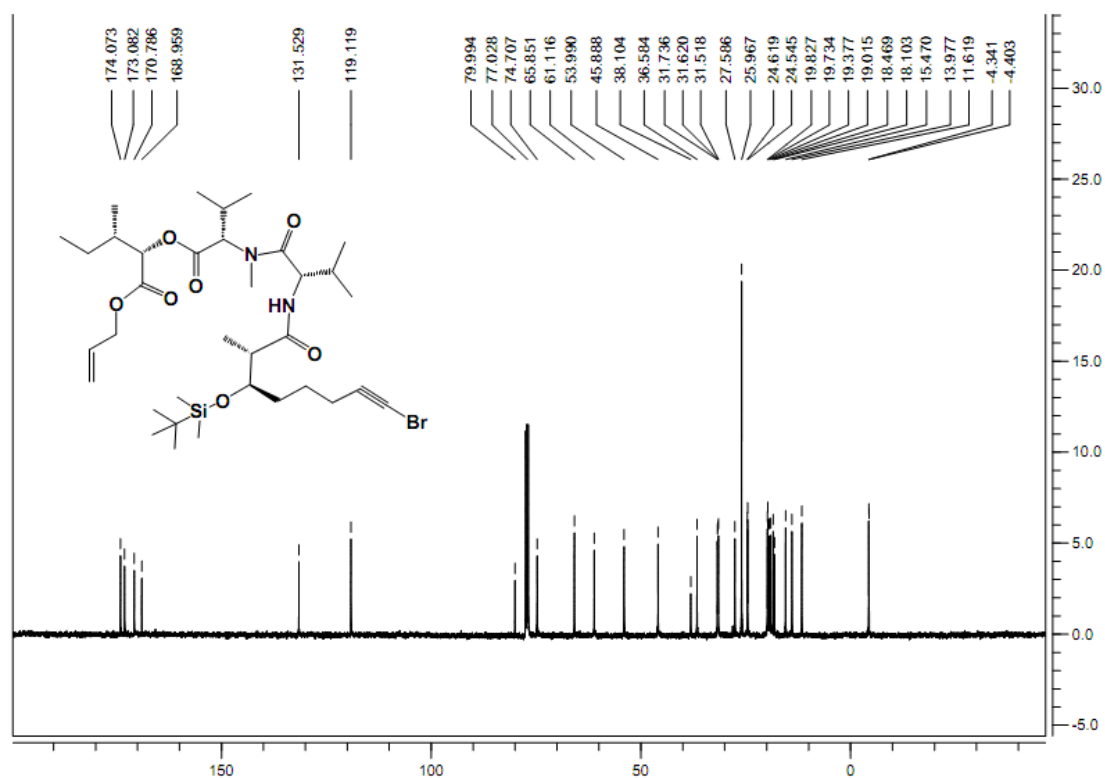

400 MHz <sup>1</sup>H NMR of **16** in CDCl<sub>3</sub>

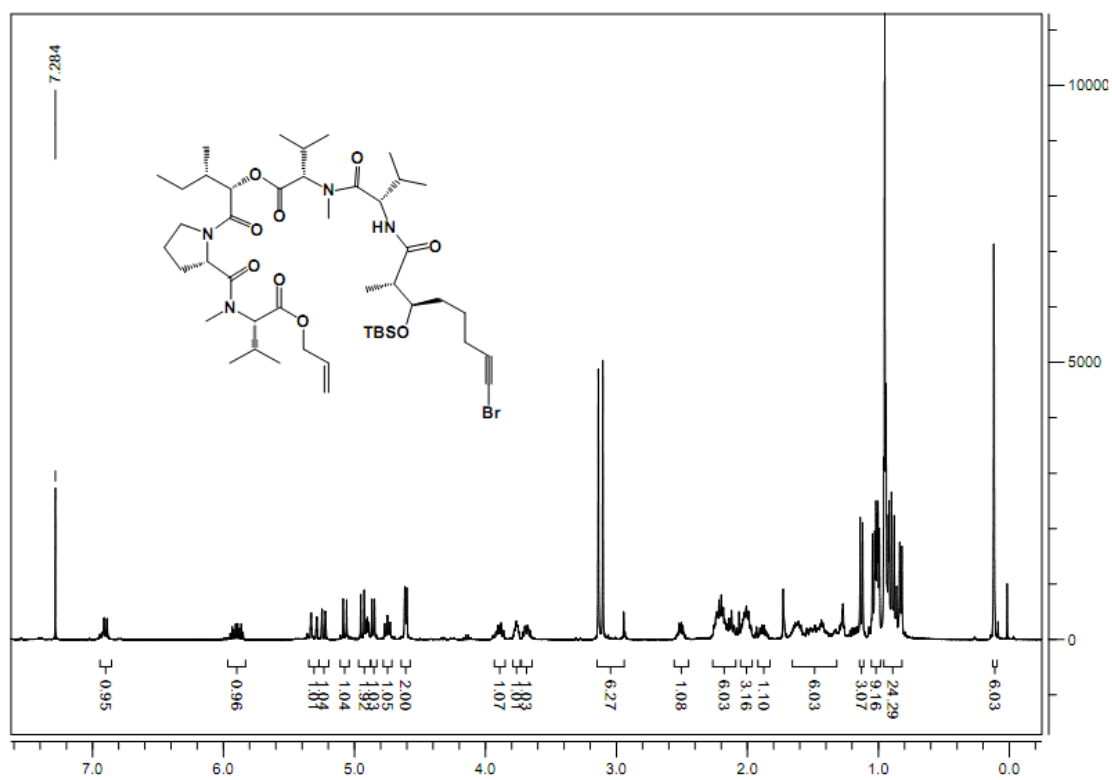

300 MHz <sup>1</sup>H NMR of **18** in CDCl<sub>3</sub>

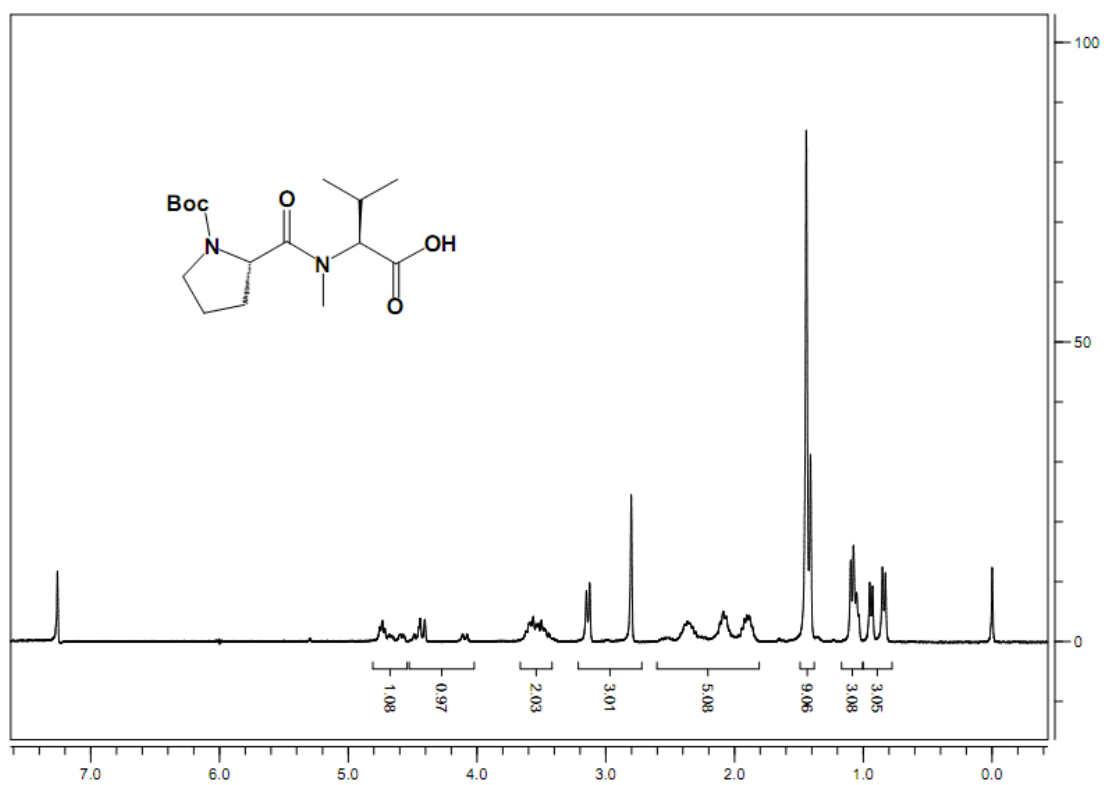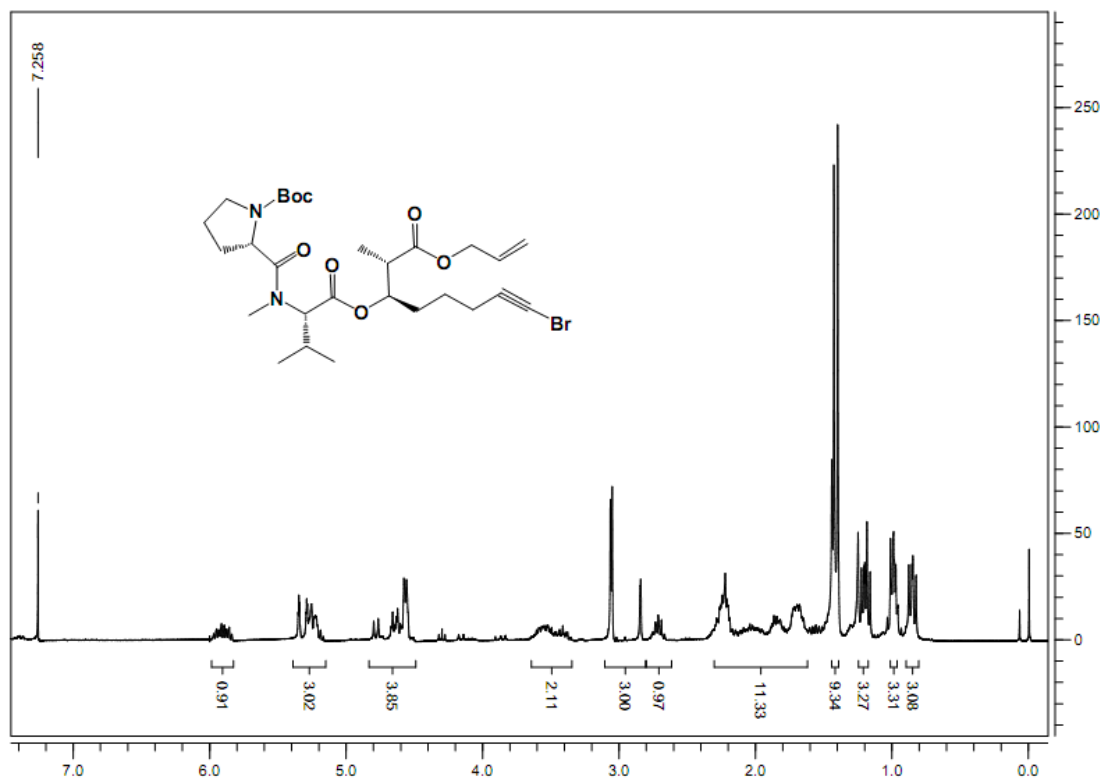





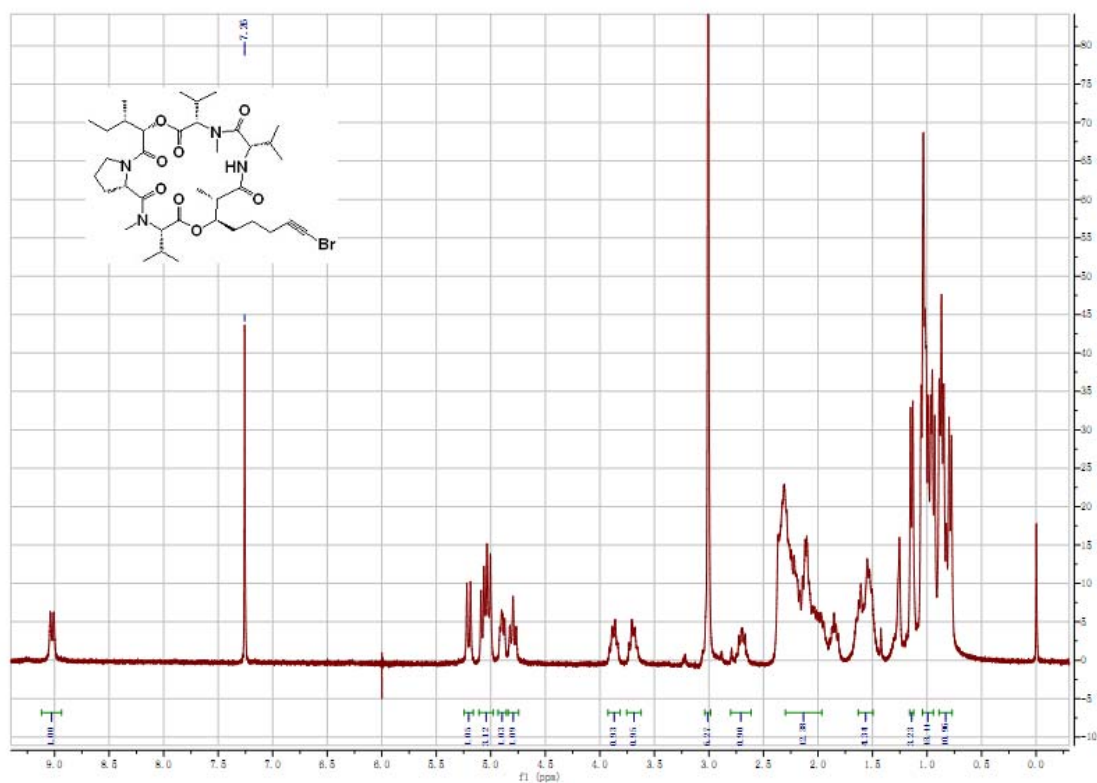

126 MHz <sup>13</sup>C NMR of 1 in CDCl<sub>3</sub>

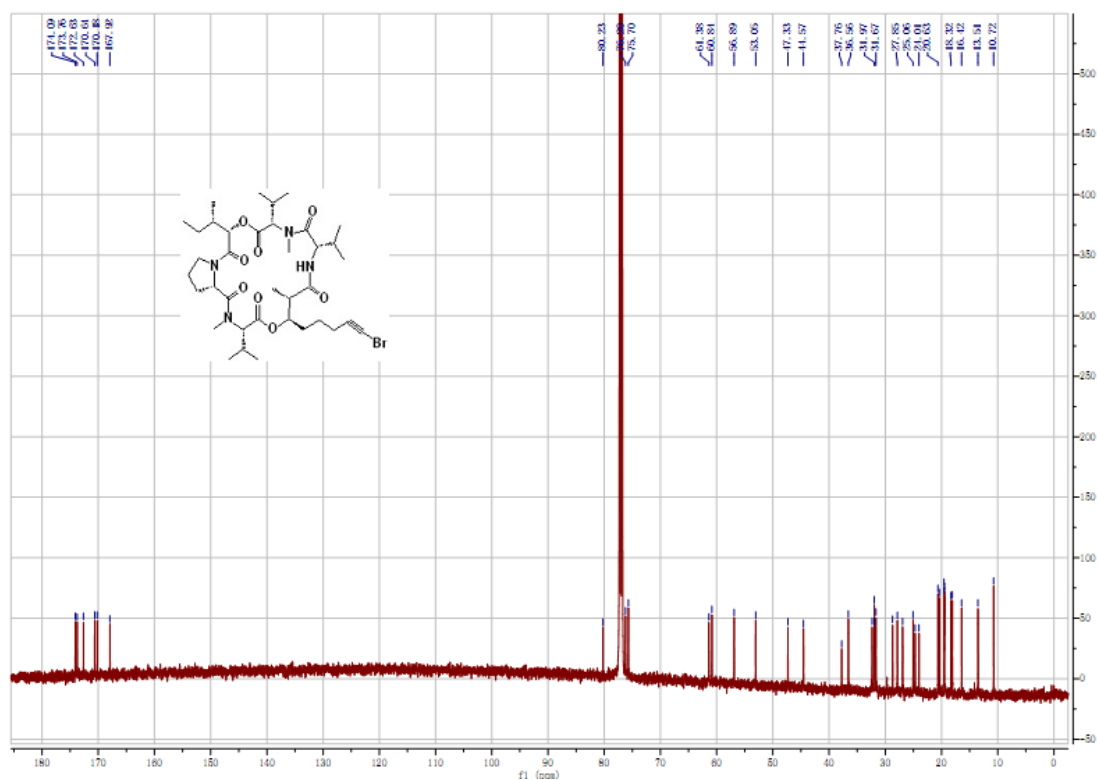

### HSQC spectrum of veraguamide A (1) in CDCl<sub>3</sub> (500 MHz)

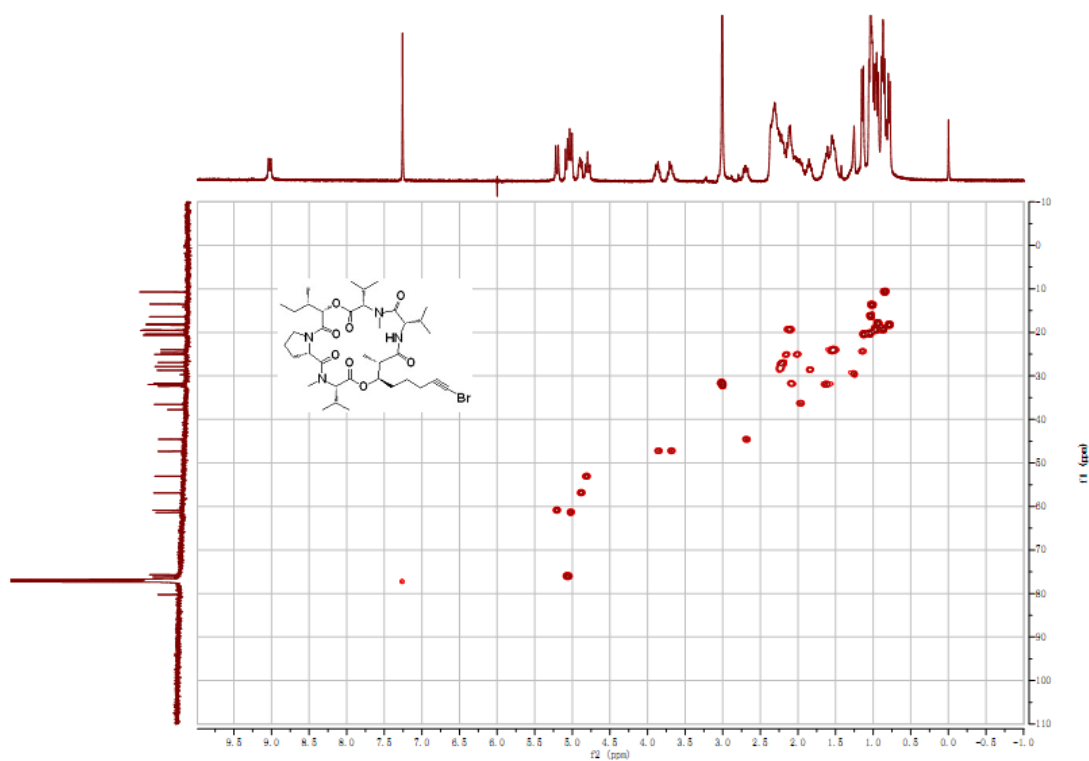

### The CD spectra of 18 and 18'

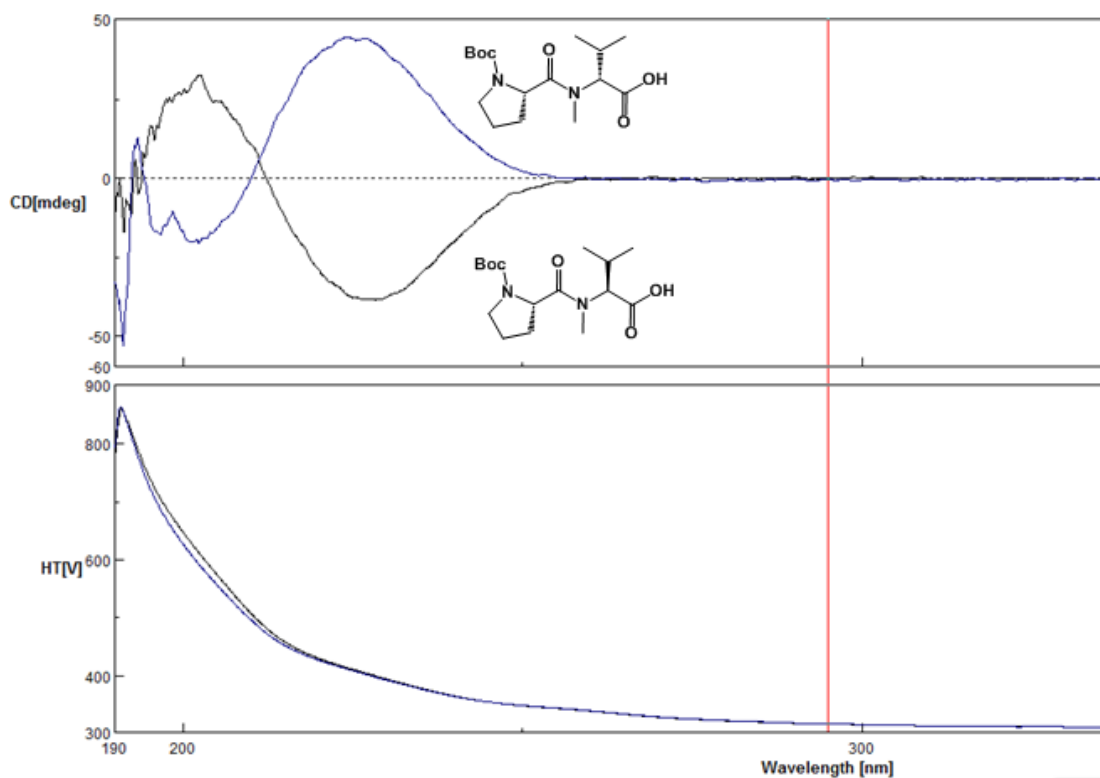

### HPLC chromatogram for P2 and P2'

Flow rate: 1ml/min

Mobile Phase: IPA:Hexane = 5:95

Column: CHIRALCEL OD-H

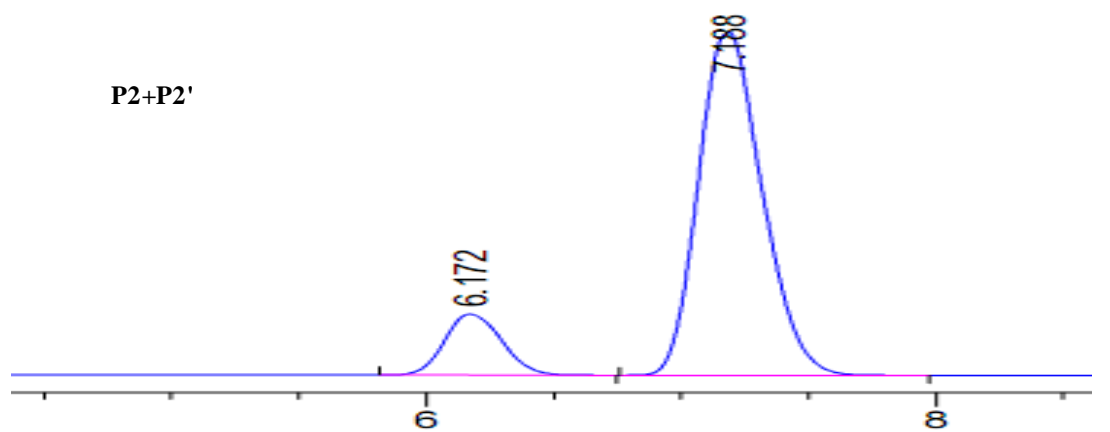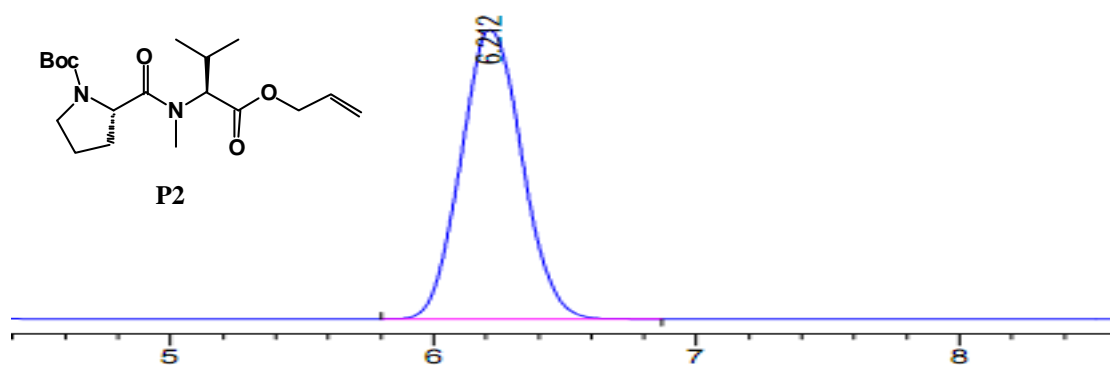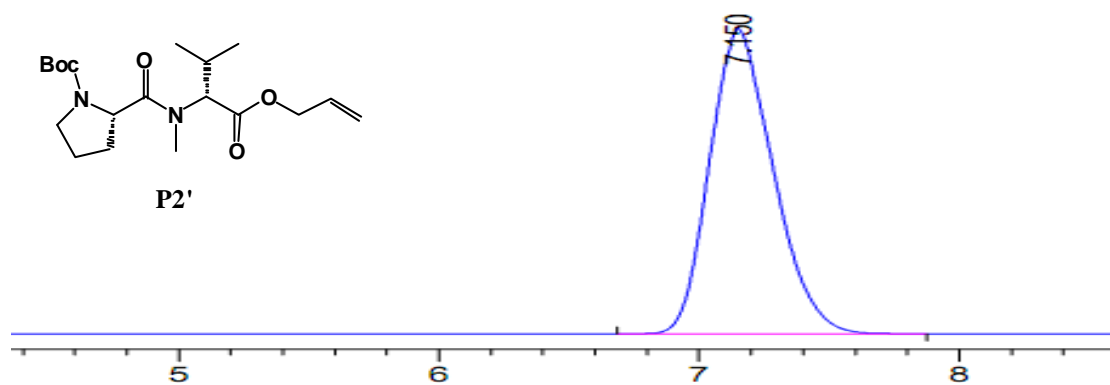

Supplement: c2ob26002f.pdf [file c2ob26002f.pdf]
